# Supplementary material for: Regional variation in life history traits and plastic responses to temperature of the major malaria vector Nyssorhynchus darlingi in Brazil
Source: PubMed Central journal article supplement (PMC6441093; doi:10.1038/s41598-019-41651-x), 2019-03-29
Supplement: 41598_2019_41651_MOESM1_ESM.pdf [file 41598_2019_41651_MOESM1_ESM.pdf]

## Regional variation in life history traits and plastic responses to temperature of the major malaria vector *Nyssorhynchus darlingi* in Brazil

V.M. Chu<sup>1,2\*</sup>, M. A. M. Sallum<sup>3</sup>, T. E. Moore<sup>4</sup>, W. Lainhart<sup>1,2,5</sup>, C.D. Schlichting<sup>4</sup> and J.E. Conn<sup>1,2\*</sup>

<sup>1</sup>Department of Biomedical Sciences, School of Public Health, University at Albany (State University of New York), Albany, NY, USA, <sup>2</sup>Wadsworth Center, New York State Department of Health, Albany, NY, USA, <sup>3</sup> Departamento de Epidemiologia, Faculdade de Saúde Pública, Universidade de São Paulo, SP, Brazil, <sup>4</sup> Department of Ecology and Evolutionary Biology, University of Connecticut, Storrs, CT, USA, <sup>5</sup> Current: Department of Pathology, University of Arizona College of Medicine, Tucson, AZ, USA, \* co-corresponding authors

### Supplementary- Methods

Climate variables were taken from WorldClim<sup>82</sup> with 30 second resolution from data spanning 1960-1990 and the NASA GISS-E2-R climate projection model under CMIP5 RCP85 forecast for 2070. The 2070 RCP85 climate data is for a high emission scenario, used in predictive modeling of spread of *Ny. darlingi* and *P. falciparum*<sup>10</sup>. Past and future bioclimate variables were aggregated for the same geographic coordinates to compare the climates with a principal component analysis. We used 19 bioclimate variables (Supplementary Table S5) drawn from 100 random points within the 4 states (Figure 1). Multiple measures of temperature and, to a slightly lesser extent, precipitation, are anticipated to change over the next 50 years in our study areas). The PCA was implemented using FactoMineR<sup>86</sup> and visualized using ggplot2<sup>87</sup>.

### Supplementary- Tables

| All specimens (n=3430) |                |    |           |
|------------------------|----------------|----|-----------|
| Effect                 | X <sup>2</sup> | df | p-value   |
| Temperature            | 165.79         | 2  | < 2.2e-16 |
| State                  | 256.19         | 3  | < 2.2e-16 |
| Temperature x State    | 10.824         | 6  | 0.09398   |

Supplementary Table S1. Proportional test results of temperature, state and their interaction on the number of surviving adults in total.

|                       | <i>Temperature</i> |                   |                    |
|-----------------------|--------------------|-------------------|--------------------|
| <b>State</b>          | 20                 | 24                | 28                 |
| <i>Amazonas</i>       | 0.91<br>(332, 31)  | 0.93<br>(333, 27) | 0.87<br>(309, 48)  |
| <i>Rondônia</i>       | 0.84<br>(373, 69)  | 0.85<br>(381, 65) | 0.68<br>(302, 144) |
| <i>Tocantins</i>      | 0.69<br>(124, 55)  | 0.69<br>(119, 54) | 0.53<br>(95, 85)   |
| <i>Rio de Janeiro</i> | 0.81<br>(129, 31)  | 0.77<br>(123, 36) | 0.2<br>(33, 132)   |

Supplementary Table S2. Proportion of mosquitoes that survived to adulthood by state and temperature, with counts of dead adults and juveniles, respectively, in parentheses.

| <b>Fixed Effects</b>       | <b>Coefficient</b> | <b>Std.Error</b> | <b>z-value</b> | <b>p-value</b>  |
|----------------------------|--------------------|------------------|----------------|-----------------|
| (Amazonas-20°C)            | 2.371              | 0.188            | 12.627         | <b>1.51E-36</b> |
| Temperature- 24°C          | 0.141              | 0.274            | 0.514          | 6.07E-01        |
| Temperature- 28°C          | -0.509             | 0.244            | -2.09          | <b>3.67E-02</b> |
| Rondônia State             | -0.684             | 0.229            | -2.986         | <b>2.83E-03</b> |
| Tocantins State            | -1.558             | 0.248            | -6.283         | <b>3.33E-10</b> |
| Rio de Janeiro State       | -0.945             | 0.274            | -3.446         | <b>5.70E-04</b> |
| Rondônia state- 24°C       | -0.06              | 0.332            | -0.181         | 8.56E-01        |
| Rondônia state- 28°C       | -0.438             | 0.295            | -1.486         | 1.37E-01        |
| Tocantins state- 24°C      | -0.164             | 0.358            | -0.457         | 6.47E-01        |
| Tocantins state- 28°C      | -0.193             | 0.328            | -0.587         | 5.57E-01        |
| Rio de Janeiro state- 24°C | -0.338             | 0.389            | -0.87          | 3.84E-01        |
| Rio de Janeiro state- 28°C | -2.303             | 0.37             | -6.217         | <b>5.06E-10</b> |

Supplementary Table S3. Analysis of proportion of mosquitoes surviving to adulthood by state and temperature using a logistic regression with a binomial family and a logit link function with temperature and state and their interaction as fixed effects. Intercept is log odds of survival at 20°C for Amazonas state.

| State                 | Temperature | Coefficient | Std.Error | z-value | p-value         |
|-----------------------|-------------|-------------|-----------|---------|-----------------|
| <i>Amazonas</i>       | 20°C        | -2.371      | 0.188     | -12.626 | <b>1.52E-36</b> |
|                       | 24°C        | -0.141      | 0.274     | -0.514  | 6.07E-01        |
|                       | 28°C        | 0.509       | 0.244     | 2.09    | <b>3.67E-02</b> |
| <i>Rondônia</i>       | 20°C        | -1.687      | 0.131     | -12.877 | <b>6.04E-38</b> |
|                       | 24°C        | -0.081      | 0.188     | -0.432  | 6.66E-01        |
|                       | 28°C        | 0.947       | 0.166     | 5.717   | <b>1.08E-08</b> |
| <i>Tocantins</i>      | 20°C        | -0.813      | 0.162     | -5.018  | <b>5.22E-07</b> |
|                       | 24°C        | 0.023       | 0.231     | 0.099   | 9.21E-01        |
|                       | 28°C        | 0.702       | 0.22      | 3.185   | <b>1.45E-03</b> |
| <i>Rio de Janeiro</i> | 20°C        | -1.426      | 0.2       | -7.128  | <b>1.02E-12</b> |
|                       | 24°C        | 0.197       | 0.276     | 0.716   | <b>4.74E-01</b> |
|                       | 28°C        | 2.812       | 0.279     | 10.076  | <b>7.03E-24</b> |

Supplementary Table S4. Analysis of proportion of mosquitoes surviving to adulthood by state and temperature. Separate logistic regressions with a binomial family and a logit link function with temperature as a fixed effect. Intercepts are log odds of survival at 20°C.

| <b>Bioclimatic Variables</b> |                                                            |                    |            |
|------------------------------|------------------------------------------------------------|--------------------|------------|
| <b>Variable</b>              | <b>Description</b>                                         | <b>Coordinates</b> |            |
|                              |                                                            | <b>PC1</b>         | <b>PC2</b> |
| BIO1                         | Annual Mean temperature                                    | -0.019             | 0.025      |
| BIO2                         | Mean Diurnal Range (Mean of monthly (max temp - min temp)) | -0.001             | 0.019      |
| BIO3                         | Isothermality (2/7) (* 100)                                | -0.009             | 0.003      |
| BIO4                         | Temperature Seasonality (standard deviation *100)          | 0.811              | -0.548     |
| BIO5                         | Max Temperature of Warmest Month                           | -0.011             | 0.031      |
| BIO6                         | Min Temperature of Coldest Month                           | -0.030             | 0.017      |
| BIO7                         | Temperature Annual Range (5-6)                             | 0.018              | 0.015      |
| BIO8                         | Mean Temperature of Wettest Quarter                        | -0.008             | 0.017      |
| BIO9                         | Mean Temperature of Driest Quarter                         | -0.032             | 0.031      |
| BIO10                        | Mean Temperature of Warmest Quarter                        | -0.008             | 0.018      |
| BIO11                        | Mean Temperature of Coldest Quarter                        | -0.029             | 0.033      |
| BIO12                        | Annual Precipitation                                       | -0.514             | -0.722     |
| BIO13                        | Precipitation of Wettest Month                             | -0.049             | -0.067     |
| BIO14                        | Precipitation of Driest Month                              | -0.020             | -0.058     |
| BIO15                        | Precipitation Seasonality (Coefficient of Variation)       | 0.005              | 0.021      |
| BIO16                        | Precipitation of Wettest Quarter                           | -0.162             | -0.175     |
| BIO17                        | Precipitation of Driest Quarter                            | -0.070             | -0.192     |
| BIO18                        | Precipitation of Warmest Quarter                           | 0.014              | -0.262     |
| BIO19                        | Precipitation of Coldest Quarter                           | -0.199             | -0.170     |

Supplementary Table S5. Bioclimatic variable description with corresponding coordinates. All bioclimatic variables from WorldClim<sup>82</sup>.

| <b>Larvae development time (days)</b> | <b>Coefficient</b> | <b>Std.Error</b> | <b>d.f.</b> | <b>t-value</b> | <b>p-value</b>  |
|---------------------------------------|--------------------|------------------|-------------|----------------|-----------------|
| (Amazonas-20°C)                       | 2.91               | 0.01             | 2566        | 199.44         | <b>&lt;.005</b> |
| Temperature- 24°C                     | -0.15              | 0.01             | 2566        | -15.34         | <b>&lt;.005</b> |
| Temperature- 28°C                     | -0.29              | 0.01             | 2566        | -26.78         | <b>&lt;.005</b> |
| Rondônia State                        | 0.13               | 0.02             | 3           | 6.41           | <b>0.01</b>     |
| Tocantins State                       | 0.16               | 0.02             | 3           | 7.00           | <b>0.01</b>     |
| Rio de Janeiro State                  | 0.25               | 0.03             | 3           | 10.01          | <b>&lt;.005</b> |
| Rondônia state- 24°C                  | -0.05              | 0.01             | 2566        | -3.91          | <b>&lt;.005</b> |
| Rondônia state- 28°C                  | 0.00               | 0.01             | 2566        | -0.18          | 0.86            |
| Tocantins state- 24°C                 | 0.05               | 0.02             | 2566        | 2.89           | <b>&lt;.005</b> |
| Tocantins state- 28°C                 | 0.10               | 0.02             | 2566        | 5.21           | <b>&lt;.005</b> |
| Rio de Janeiro state- 24°C            | -0.05              | 0.02             | 2566        | -3.12          | <b>&lt;.005</b> |
| Rio de Janeiro state- 28°C            | -0.05              | 0.03             | 2566        | -1.91          | 0.06            |

Supplementary Table S6. GLMM results showing the effects of population, rearing temperature, and their interaction on larval development. Random effects: Locality and Family nested in Locality. *d.f.*-degrees of freedom

| <b>Pupal development time (days)</b> | <b>Coefficient</b> | <b>Std.Error</b> | <b>d.f.</b> | <b>t-value</b> | <b>p-value</b>  |
|--------------------------------------|--------------------|------------------|-------------|----------------|-----------------|
| (Intercept)                          | 1.06               | 0.01             | 2566        | 132.61         | <b>&lt;.005</b> |
| Temperature- 24°C                    | -0.41              | 0.01             | 2566        | -28.61         | <b>&lt;.005</b> |
| Temperature- 28°C                    | -0.56              | 0.02             | 2566        | -33.78         | <b>&lt;.005</b> |
| Rondônia State                       | 0.05               | 0.01             | 3           | 4.78           | <b>1.74E-02</b> |
| Tocantins State                      | -0.12              | 0.02             | 3           | -7.39          | <b>5.10E-03</b> |
| Rio de Janeiro State                 | 0.10               | 0.01             | 3           | 7.40           | <b>5.10E-03</b> |
| Rondônia state- 24°C                 | -0.04              | 0.02             | 2566        | -2.23          | <b>2.58E-02</b> |
| Rondônia state- 28°C                 | -0.25              | 0.03             | 2566        | -9.78          | <b>&lt;.005</b> |
| Tocantins state- 24°C                | 0.09               | 0.03             | 2566        | 3.01           | <b>2.60E-03</b> |
| Tocantins state- 28°C                | -0.24              | 0.04             | 2566        | -5.48          | <b>&lt;.005</b> |
| Rio de Janeiro state- 24°C           | -0.06              | 0.03             | 2566        | -2.12          | <b>3.38E-02</b> |
| Rio de Janeiro state- 28°C           | -0.36              | 0.06             | 2566        | -5.97          | <b>&lt;.005</b> |

Supplementary Table S7. GLMM results showing the effects of population, rearing temperature, and their interaction on pupal development. Random effects: Locality and Family nested in Locality. *d.f.*-degrees of freedom

| <b>Emergence time (days)</b>  | <b>Coefficient</b> | <b>Std.Error</b> | <b>d.f.</b> | <b>t-value</b> | <b>p-value</b>  |
|-------------------------------|--------------------|------------------|-------------|----------------|-----------------|
| (Intercept)                   | 3.05               | 0.01             | 2566        | 237.30         | <b>&lt;.005</b> |
| Temperature- 24°C             | -0.18              | 0.01             | 2566        | -20.77         | <b>&lt;.005</b> |
| Temperature- 28°C             | -0.33              | 0.01             | 2566        | -33.07         | <b>&lt;.005</b> |
| Rondônia State                | 0.12               | 0.02             | 3           | 6.56           | <b>6.90E-03</b> |
| Tocantins State               | 0.12               | 0.02             | 3           | 6.01           | <b>8.50E-03</b> |
| Rio de Janeiro State          | 0.23               | 0.02             | 3           | 10.47          | <b>1.90E-03</b> |
| Rondônia state- 24°C          | -0.05              | 0.01             | 2566        | -4.10          | <b>&lt;.005</b> |
| Rondônia state- 28°C          | -0.02              | 0.01             | 2566        | -1.68          | <b>9.38E-02</b> |
| Tocantins state- 24°C         | 0.06               | 0.02             | 2566        | 3.84           | <b>1.00E-03</b> |
| Tocantins state- 28°C         | 0.08               | 0.02             | 2566        | 4.64           | <b>&lt;.005</b> |
| Rio de Janeiro state-<br>24°C | -0.05              | 0.01             | 2566        | -3.22          | <b>1.30E-03</b> |
| Rio de Janeiro state-<br>28°C | -0.07              | 0.02             | 2566        | -2.91          | <b>3.60E-03</b> |

Supplementary Table S8. GLMM results showing the effects of population, rearing temperature, and their interaction on time to emergence. Random effects: Locality and Family nested in Locality. *d.f.*-degrees of freedom

| <b>Adult longevity (days)</b> | <b>Coefficient</b> | <b>Std.Error</b> | <b>d.f.</b> | <b>t-value</b> | <b>P-value</b>  |
|-------------------------------|--------------------|------------------|-------------|----------------|-----------------|
| (Amazonas-20°C)               | 1.55               | 0.02             | 2566        | 92.89          | <b>&lt;.005</b> |
| Temperature- 24°C             | -0.49              | 0.02             | 2566        | -28.36         | <b>&lt;.005</b> |
| Temperature- 28°C             | -0.86              | 0.02             | 2566        | -42.66         | <b>&lt;.005</b> |
| Rondônia State                | -0.14              | 0.02             | 3           | -6.19          | <b>0.01</b>     |
| Tocantins State               | -0.30              | 0.03             | 3           | -9.18          | <b>&lt;.005</b> |
| Rio de Janeiro State          | 0.00               | 0.03             | 3           | 0.08           | 0.94            |
| Rondônia state- 24°C          | 0.14               | 0.02             | 2566        | 5.89           | <b>&lt;.005</b> |
| Rondônia state- 28°C          | -0.01              | 0.03             | 2566        | -0.22          | 0.83            |
| Tocantins state- 24°C         | 0.09               | 0.04             | 2566        | 2.40           | <b>0.02</b>     |
| Tocantins state- 28°C         | 0.22               | 0.04             | 2566        | 5.16           | <b>&lt;.005</b> |
| Rio de Janeiro state- 24°C    | -0.10              | 0.03             | 2566        | -2.94          | <b>&lt;.005</b> |
| Rio de Janeiro state- 28°C    | -0.04              | 0.06             | 2566        | -0.74          | 0.46            |

Supplementary Table S9. GLMM results showing the effects of population, rearing temperature, and their interaction on adult longevity. Random effects: Locality and Family nested in Locality. *d.f.*-degrees of freedom

| Wing length (mm)              | Coefficient | Std.Error | d.f. | t-value | P-value     |
|-------------------------------|-------------|-----------|------|---------|-------------|
| (Amazonas-20°C)               | 1.02        | 0.00      | 2493 | 256.23  | <.005       |
| Temperature- 24°C             | -0.06       | 0.00      | 2493 | -16.98  | <.005       |
| Temperature- 28°C             | -0.09       | 0.00      | 2493 | -23.62  | <.005       |
| Rondônia State                | 0.01        | 0.01      | 3    | 2.51    | <b>0.09</b> |
| Tocantins State               | 0.01        | 0.01      | 3    | 1.96    | 0.14        |
| Rio de Janeiro State          | 0.08        | 0.01      | 3    | 11.66   | <.005       |
| Rondônia state- 24°C          | 0.00        | 0.00      | 2493 | 0.65    | 0.52        |
| Rondônia state- 28°C          | -0.02       | 0.01      | 2493 | -4.84   | <.005       |
| Tocantins state- 24°C         | 0.03        | 0.01      | 2493 | 4.91    | <.005       |
| Tocantins state- 28°C         | 0.01        | 0.01      | 2493 | 0.98    | 0.32        |
| Rio de Janeiro state-<br>24°C | -0.02       | 0.01      | 2493 | -2.71   | <b>0.01</b> |
| Rio de Janeiro state-<br>28°C | -0.04       | 0.01      | 2493 | -4.19   | <.005       |

Supplementary Table S10. GLMM results showing the effects of population, rearing temperature, and their interaction on wing length. Random effects: Locality and Family nested in Locality. *d.f.*-degrees of freedom

| <b>Biome</b>                                 | Amazon        |        |                |        | Cerrado           |     | Mata Atlântica  |
|----------------------------------------------|---------------|--------|----------------|--------|-------------------|-----|-----------------|
| <b>State</b>                                 | Amazonas      |        | Rondônia       |        | Tocantins         |     | Rio de Janeiro  |
| <b>Collection Month</b>                      | October       |        | July           |        | March             |     | May             |
| <b>Months high precipitation*</b>            | January-April |        | December-March |        | November-February |     | October-January |
| <b>Locality</b>                              | ARS           | APR    | RPV            | RMO    | TLC               | TPN | SJU             |
| <b>Latitude</b>                              | -2.864        | -3.028 | -8.742         | -9.223 | -10.7             | -   | -22.611         |
| <b># Females collected</b>                   | 20            | 53     | 95             | 45     | 34                | 14  | 15              |
| <b># Females allowed to lay eggs</b>         | 20            | 50     | 50             | 45     | 34                | 14  | 15              |
| <b># Females laid eggs in lab</b>            | 12            | 39     | 40             | 33     | 9                 | 6   | 12              |
| <b># Families used in life history study</b> | 10            | 15     | 15             | 15     | 8                 | 4   | 11              |

Supplementary Table S11. Field collected female data. All collections occurred in 2016.

\*Precipitation data from monthly averages collected from 1961-1990<sup>84-85</sup>.



*Supplementary- Figures*

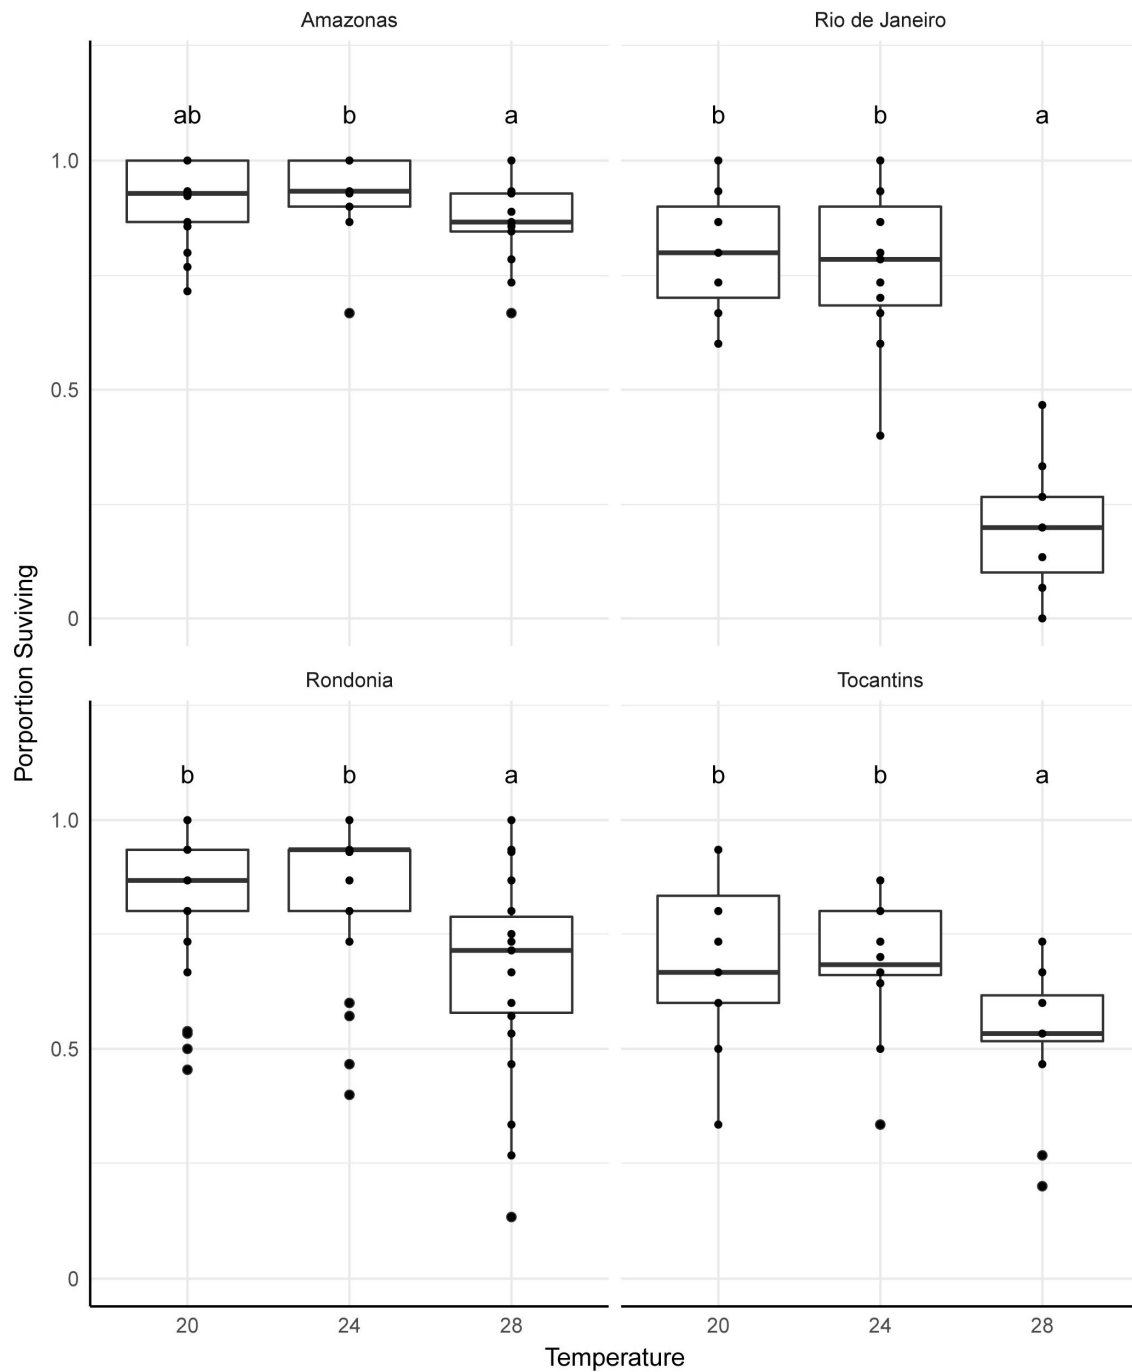

Supplementary Figure S1. Boxplots of survival to eclosion as adults, by state and temperature. Boxplots show means and interquartile ranges. Each point is the mean of a maternal family. Different letters within a state indicate significant differences in proportion surviving among temperatures (see Supplementary Table S2).

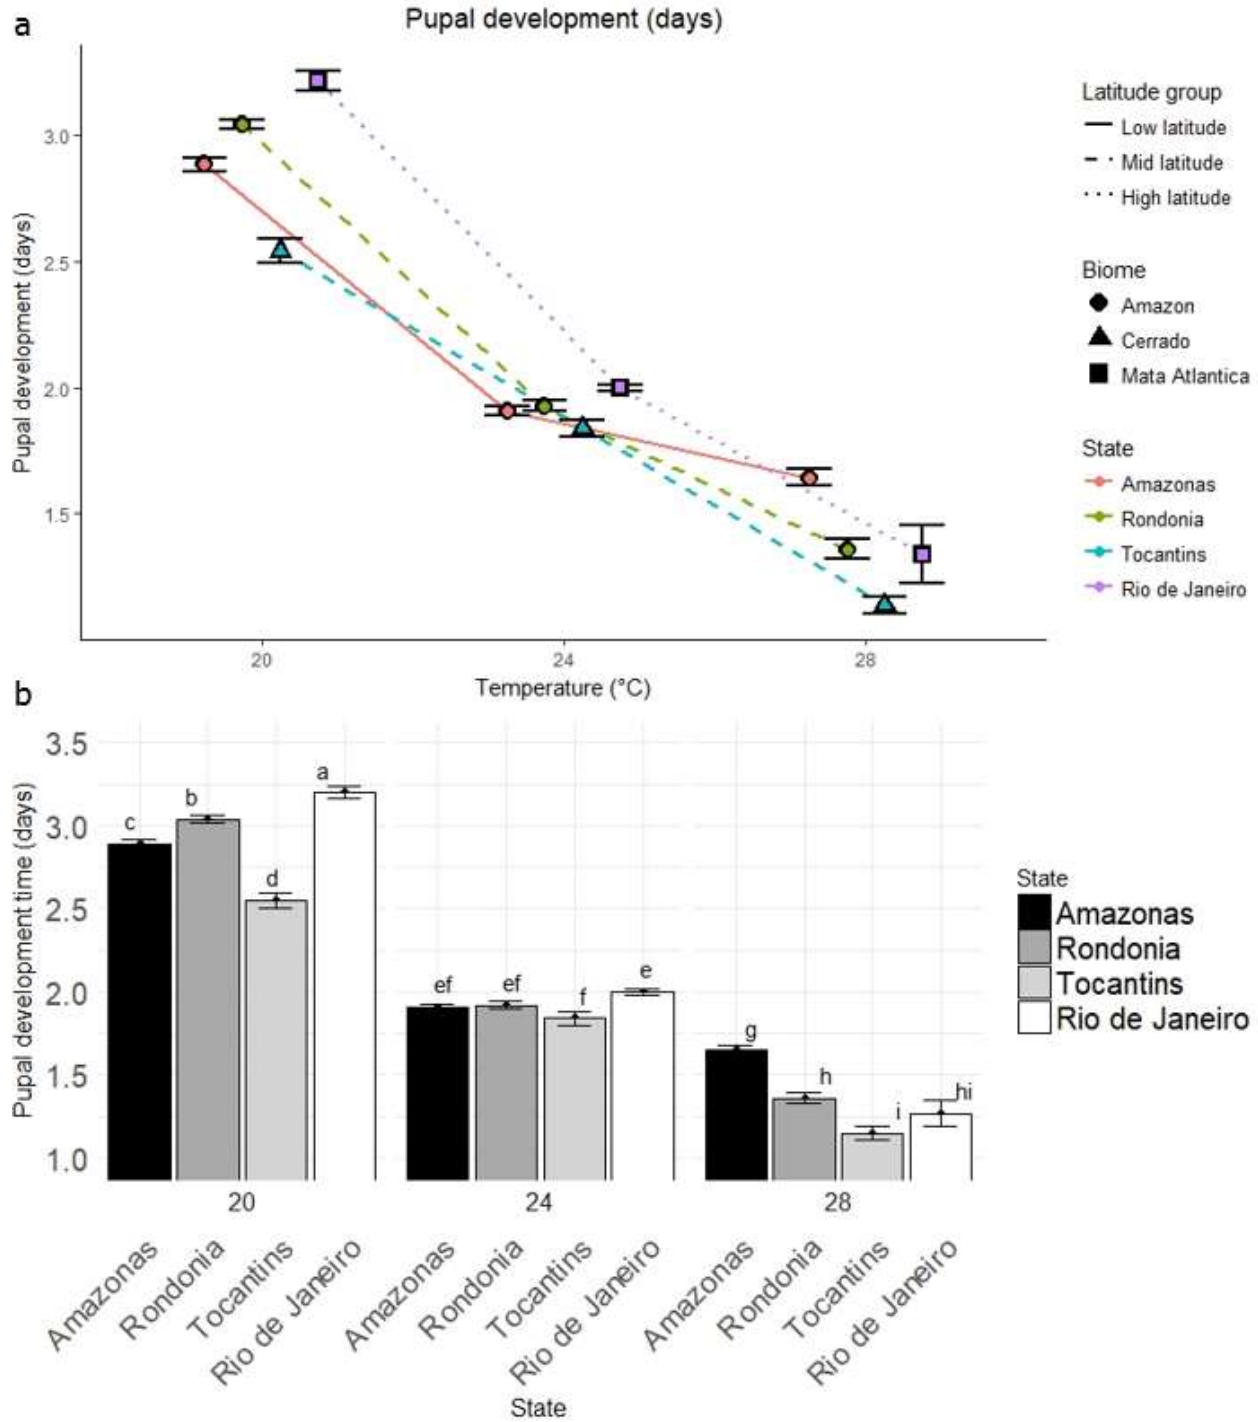

Supplementary Figure S2. Average duration of pupal development times (days) with standard error by state (a). Average pupal development times (days) (b) with standard error. Letters above bars are derived from Tukey HSD after GLMM and indicate significantly different groups ( $p$ -value  $< 0.05$ ).

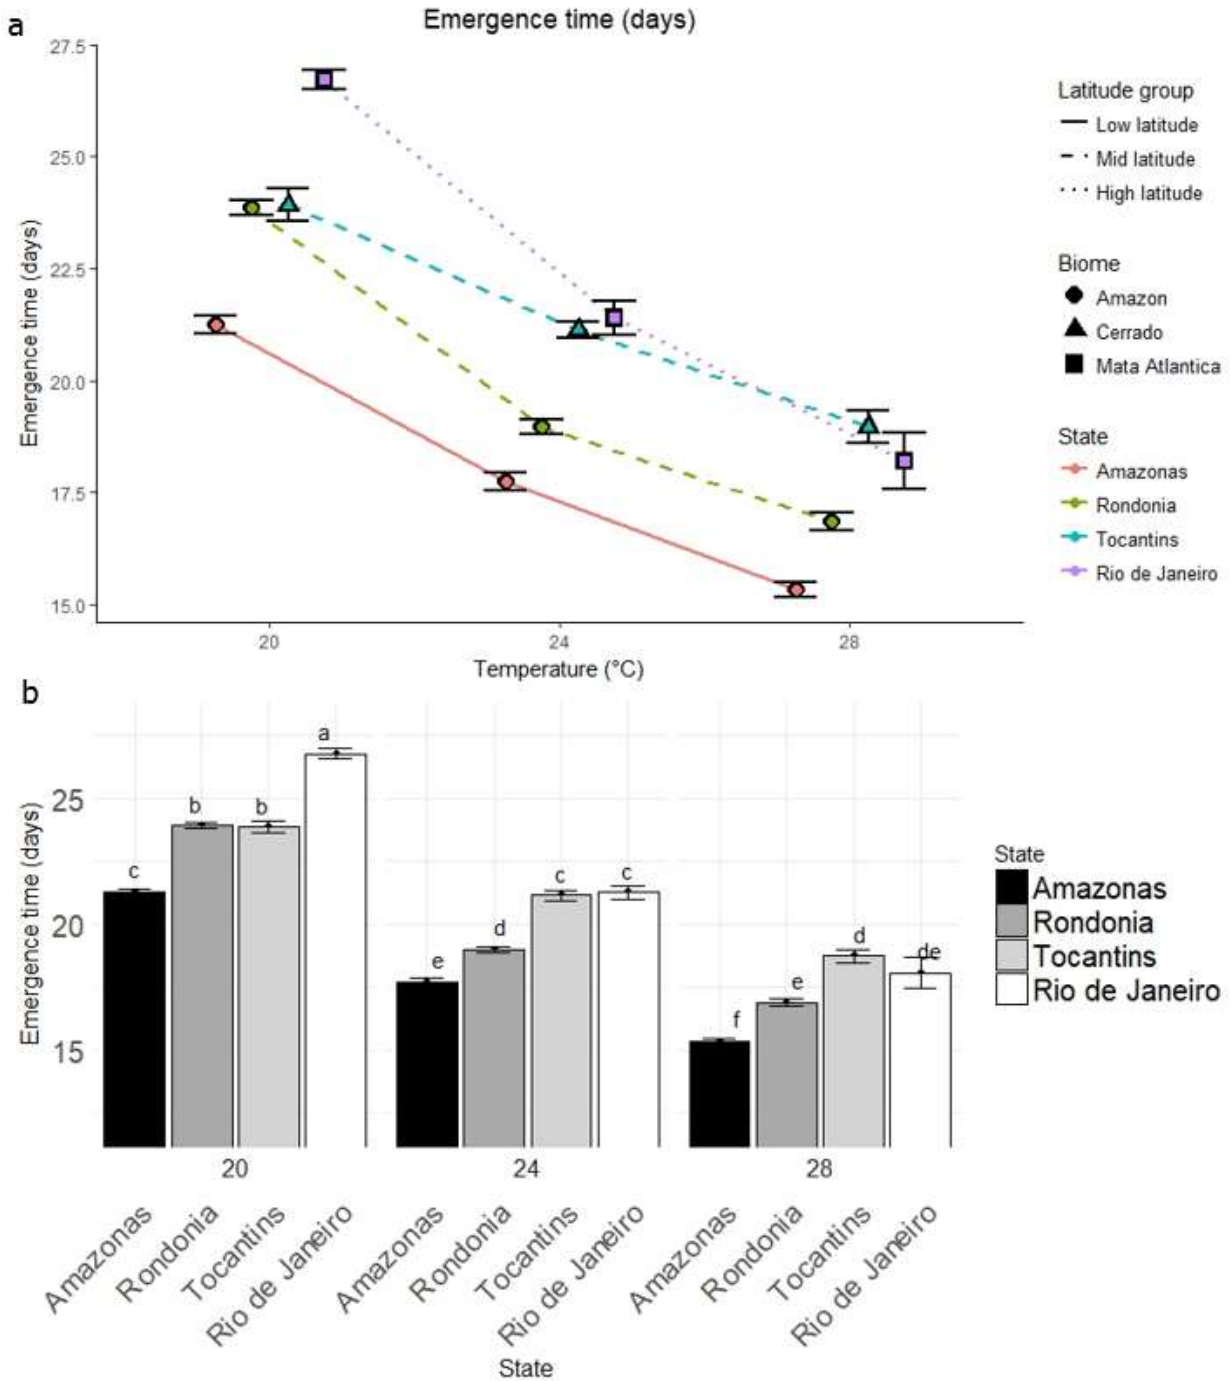

Supplementary Figure S3. Average time to adult emergence (days) with standard error by state (a). Average pupal development times (days) (b) with standard error is graphed. Letters above bars derived from Tukey HSD of data after GLMM and indicate significantly different groups ( $p$ -value  $<0.05$ ).

Supplementary Figure S4. Average duration of larvae development (days, **a**), average adult life (days, **b**), and average wing length (mm, **c**) with standard error bars. Letters above bars derived from Tukey HSD after GLMM, with different letters indicate significantly different groups ( $p$ -value  $<0.05$ ).

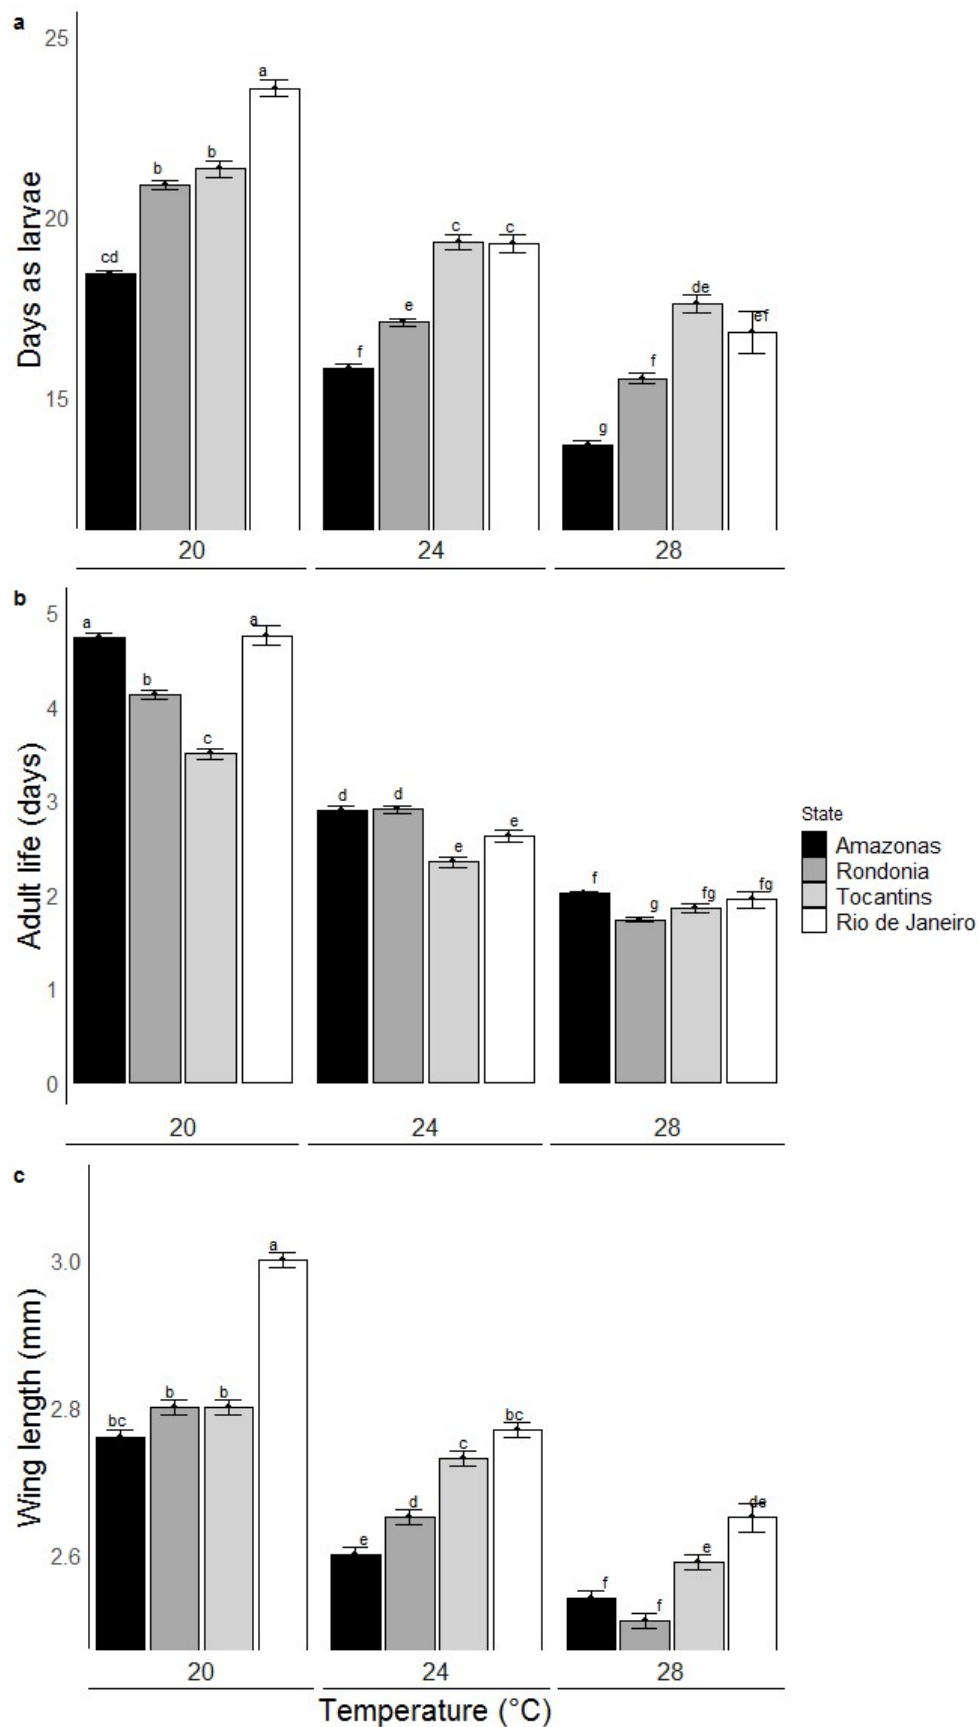

**References**

86. Sebastien Le, Julie Josse, F. H. FactoMineR: An R Package for Multivariate Analysis. *J. Stat. Softw.* **25**, 1–18 (2008).
87. Wickham, H. *ggplot2: Elegant Graphics for Data Analysis*. (Springer-Verlag New York, 2009).
